# Supplementary material
Source: MDPI journal article supplement (https://www.mdpi.com/2079-9292/10/8/959)

# APPENDICES

## APPENDIX A. RESEARCH QUESTIONNAIRE

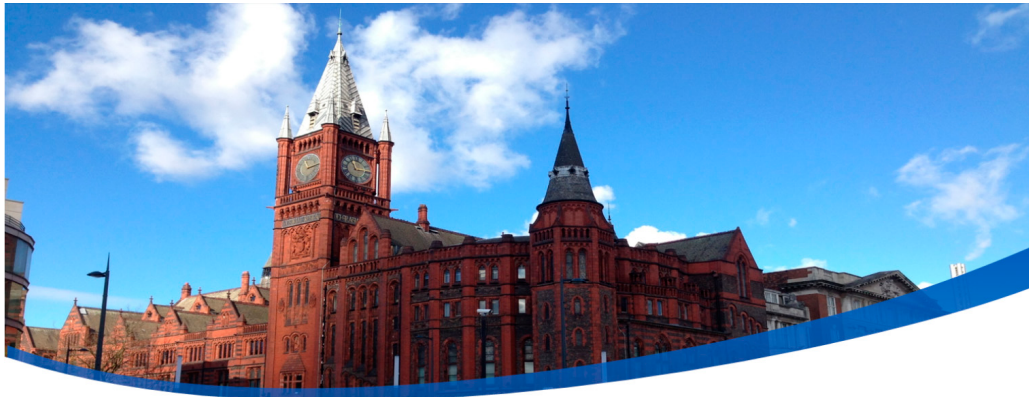

### Cloud ERP Decision-Making Process Survey

Dear participant:

My name is Marlene Marinho and I am a graduate student at the **University of Liverpool** where I am studying for a Master of Science in Information Systems Management. For the final project, I am researching the **Cloud ERP decision making process in the Consumer Goods Industry**. You were selected to participate on this survey because you are working on the Consumer Goods Industry and part of the decision making process. The results of the survey will be of benefit to all companies that wish to implement Cloud ERP. We are sure you'll understand the benefit of us collecting this data, and we thank you in advance for your help with this, if you can.

Your responses will remain completely anonymous and will only be used collectively; there are no right or wrong answers on this survey. There is also no compensation for responding to this survey.

Participation in this survey is entirely voluntary and if you do not wish to take part then please ignore the survey. If at any point you do not want to continue, you can close the window, which will disregard any of your answers you have already provided to be used in the project. If you are completing the survey, please ensure that you click on the Submit button at the very end of it. If you prefer to complete the survey in multiple iterations, you can save the survey partially and complete it later.

It is estimated that the **38** questions will take approximately **15** minutes to complete.

Any concerns about the ethical aspects of this research can be addressed to the University's Research Participant Advocate at [liverpoolethics@ohcampus.com](mailto:liverpoolethics@ohcampus.com). Any other questions or comments regarding the survey, please contact me at [marlene.marinho@online.liverpool.ac.uk](mailto:marlene.marinho@online.liverpool.ac.uk).

You may keep a copy of this Participant Information Sheet for your records.

**1. By clicking on the Yes option, you will accept to participate on this survey. \***

☐ Yes

☐ No

Next

0%

**2. Do you work in the Consumer Goods Industry? \***

☐ Yes

☐ No

**3. Does your company work with an Enterprise Resource Planning (ERP) System? \***

☐ Yes

☐ No

**4. Which of the following most closely matches your job title? \***

☐ Top Level Executive

☐ Senior Vice President

☐ Vice President

☐ Director

☐ Manager

☐ Professional

☐ Owner

☐ Other - Write In (Required)

\*

Next

9%

# Cloud ERP adoption factors

The goal of this study is to understand the factors that influence the adoption of Cloud ERP under technology, organisational and environment angles.

Please indicate the degree to which you agree/disagree with each of the following statements based on the following scale:

Strongly disagree; Disagree; Neutral; Agree; Strongly Agree

**5. RA1. Cloud ERP adoption brings cost savings to our organization. \***

Strongly disagree      Disagree      Neutral      Agree      Strongly agree

☐      ☐      ☐      ☐      ☐

**6. RA2. Adopting Cloud ERP improves our operations in terms of business continuity and disaster recovery plans. \***

Strongly disagree      Disagree      Neutral      Agree      Strongly agree

☐      ☐      ☐      ☐      ☐

**7. RA3. Cloud ERP adoption increases the ability to perform tasks quicker. \***

Strongly disagree      Disagree      Neutral      Agree      Strongly agree

☐      ☐      ☐      ☐      ☐

**8. RA4. Cloud ERP adoption contributes to scalability and flexibility of resources. \***

Strongly disagree      Disagree      Neutral      Agree      Strongly agree

☐      ☐      ☐      ☐      ☐

Next

18%

**9. C1. Current infrastructure in terms of hardware and software is compatible with Cloud ERP. \***

Strongly disagree      Disagree      Neutral      Agree      Strongly agree

☐      ☐      ☐      ☐      ☐

**10. C2. Adopting Cloud ERP is in line with the mission and values from our organization. \***

Strongly disagree      Disagree      Neutral      Agree      Strongly agree

☐      ☐      ☐      ☐      ☐

**11. C3. The Cloud ERP adoption is compatible with the operations from the organization. \***

Strongly disagree      Disagree      Neutral      Agree      Strongly agree

☐      ☐      ☐      ☐      ☐

Next

27%

**12. TR1. A mature ICT infrastructure is an incentive to Cloud ERP adoption. \***

Strongly disagree

☐

Disagree

☐

Neutral

☐

Agree

☐

Strongly agree

☐

**13. TR2. The organization has the needed managerial and technical skills to adopt Cloud ERP. \***

Strongly disagree

☐

Disagree

☐

Neutral

☐

Agree

☐

Strongly agree

☐

Next

36%

**14. CX1. The migration of the existing ERP system to Cloud ERP is too complex. \***

Strongly disagree

☐

Disagree

☐

Neutral

☐

Agree

☐

Strongly agree

☐

**15. CX2. The skills needed to adopt Cloud ERP are too complex for the staff. \***

Strongly disagree

☐

Disagree

☐

Neutral

☐

Agree

☐

Strongly agree

☐

**16. CX3. The complexity of Cloud ERP is frustrating the users when using the system. \***

Strongly disagree

☐

Disagree

☐

Neutral

☐

Agree

☐

Strongly agree

☐

**17. CX4. Data security and confidentiality are concerns when adopting Cloud ERP. \***

Strongly disagree

☐

Disagree

☐

Neutral

☐

Agree

☐

Strongly agree

☐

Next

45%

**18. OC1. Cloud ERP adoption is influenced by the cloud ERP knowledge available in the organization. \***

Strongly disagree      Disagree      Neutral      Agree      Strongly agree

☐      ☐      ☐      ☐      ☐

**19. OC2. The culture of the company is pro-innovation and supports Cloud ERP adoption. \***

Strongly disagree      Disagree      Neutral      Agree      Strongly agree

☐      ☐      ☐      ☐      ☐

**20. TMS1. The organization's management supports Cloud ERP implementation. \***

Strongly disagree      Disagree      Neutral      Agree      Strongly agree

☐      ☐      ☐      ☐      ☐

**21. TMS2. Strong leadership is provided by Top Management who enlists the necessary resources for Cloud ERP adoption. \***

Strongly disagree      Disagree      Neutral      Agree      Strongly agree

☐      ☐      ☐      ☐      ☐

**22. TMS3. Top management is willing to accept financial and operational risks involved in the Cloud ERP adoption. \***

Strongly disagree      Disagree      Neutral      Agree      Strongly agree

☐      ☐      ☐      ☐      ☐

Next

55%

**23. OS1. The larger the organization is, the higher is Cloud ERP adoption. \***

Strongly disagree      Disagree      Neutral      Agree      Strongly agree

☐      ☐      ☐      ☐      ☐

**24. OS2. Larger organizations are more likely to make financial investments in Cloud ERP adoption. \***

Strongly disagree      Disagree      Neutral      Agree      Strongly agree

☐      ☐      ☐      ☐      ☐

**25. RC1. Government policy provide incentives for your organization to adopt Cloud ERP. \***

Strongly disagree      Disagree      Neutral      Agree      Strongly agree

☐      ☐      ☐      ☐      ☐

---

**26. RC2. Current law and regulations are sufficient to protect the adoption of Cloud ERP. \***

Strongly disagree      Disagree      Neutral      Agree      Strongly agree

☐      ☐      ☐      ☐      ☐

---

Next

64%

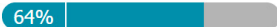

**27. CP1. Our organization believes that the price competition pressure to reduce operating and maintenance costs is an incentive to adopt cloud ERP. \***

Strongly disagree      Disagree      Neutral      Agree      Strongly agree

☐      ☐      ☐      ☐      ☐

**28. CP2. Quality competition in terms of delivered better products and services are an incentive to adopt Cloud ERP. \***

Strongly disagree      Disagree      Neutral      Agree      Strongly agree

☐      ☐      ☐      ☐      ☐

**29. CP3. The competition in our sector has already adopted Cloud ERP. \***

Strongly disagree      Disagree      Neutral      Agree      Strongly agree

☐      ☐      ☐      ☐      ☐

---

Next

73%

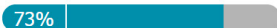

**30. VS1. Our vendors provide the technical support needed to adopt Cloud ERP. \***

Strongly disagree      Disagree      Neutral      Agree      Strongly agree

☐      ☐      ☐      ☐      ☐

**31. VS2. Our vendors contribute with skilled professionals to adopt Cloud ERP. \***

Strongly disagree      Disagree      Neutral      Agree      Strongly agree

☐      ☐      ☐      ☐      ☐

**32. VS3. Our vendors provide skilled training to our staff to support Cloud ERP adoption. \***

Strongly disagree      Disagree      Neutral      Agree      Strongly agree

☐      ☐      ☐      ☐      ☐

---

Thank you for answering and you are almost finished. The next section is related to a couple of questions about your organization and yourself.

Next

82%

## Organization Profile

**33. What is the classification of your company in the consumer goods industry? \***

-- Please Select --

**34. What is the geographic footprint of your organization?**

*Please select one or more options when applicable. \**

- ☐ Global (All Continents)
- ☐ Africa
- ☐ Asia
- ☐ Europe
- ☐ Middle East
- ☐ North America
- ☐ South America
- ☐ Oceania

**35. How many employees does your organization have? \***

- ☐ 1-100 (Small Company)
- ☐ 101-999 (Medium Company)
- ☐ More than 1000 (Large Company)

**36. What is the annual revenue of your company? \***

- ☐ Less than 50 million dollars
- ☐ Between 50 million and 1 billion dollars
- ☐ More than 1 billion dollars

**37. Which Cloud Services have you already adopted for your ERP or plan to adopt in the next two years ?**

*Please select one or more options when applicable. \**

- ☐ Infrastructure as a Service (IaaS)
  - ☐ Platform as a Service (PaaS)
  - ☐ Software as a Service (SaaS)
  - ☐ None of the above
- 

**38. Which Cloud service model deployment(s) have you already adopted for the ERP or plan to adopt in the next two years?**

*Please select one or more options when applicable. \**

- ☐ Private
  - ☐ Public
  - ☐ Hybrid
  - ☐ Community
  - ☐ None of the above
- 

Submit

91% 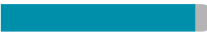

## APPENDIX B. IT ARTEFACT

Introduction page with a short instruction on how to use the DSS:

### Decision Support System for Cloud ERP

Cloud Computing has changed the way organizations source their needs in terms of computing.

The program provides you with a decision system based on both the relevance of the factors selected by you and on the answers of 110 key user decision makers that defined which Cloud Model and Cloud Service to select .

When clicking on button Start on this page , the factor's priorities based on your business needs will need to be entered in every column "Which is more relevant? A or B?" and "Scale (1-9)".

Finally, when completing the factor's relevance, click on "View Reports" button to open the Reports worksheet where you will see what Cloud Model and Cloud Service to adopt for your organization.

You can find more details and instructions on the READ.ME page.

Start

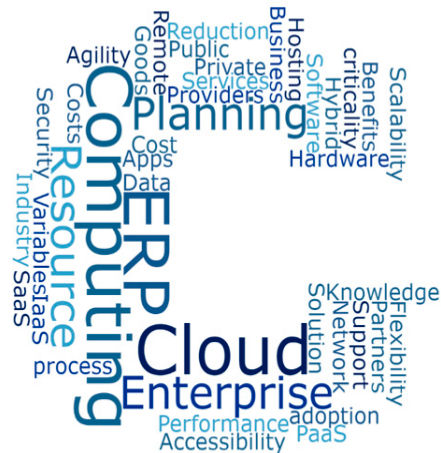

|   |   |         |                           |                          |         |         |   |
|---|---|---------|---------------------------|--------------------------|---------|---------|---|
| < | > | Welcome | Define Factors Priorities | Decision Model Survey RS | Reports | READ.ME | + |
|---|---|---------|---------------------------|--------------------------|---------|---------|---|

Define factors Priorities page where the user selects based on a pairwise comparison which factor is more important and what the weight of that importance is:

Define your Company's priorities

Fill both columns on every table below: "Which is more relevant? A or B?" and "Scale (1-9)"

Define which item is more important and by how much on "Scale (1-9)"

Use the following scale:

| Scale | Definition                                                  |
|-------|-------------------------------------------------------------|
| 1     | Equal importance of both variables                          |
| 2     | Weak importance of one variable over the other              |
| 3     | Moderate importance of one variable over the other          |
| 4     | Moderate plus importance of one variable over the other     |
| 5     | Strong importance of one variable over the other            |
| 6     | Strong plus importance of one variable over the other       |
| 7     | Very Strong importance one variable over the other          |
| 8     | Very, very strong importance of one variable over the other |
| 9     | Extreme importance of one variable over the other           |

| Relative Advantage (RA) |                                     |                                 |             |                           |                            |
|-------------------------|-------------------------------------|---------------------------------|-------------|---------------------------|----------------------------|
| A                       | B                                   | Which is more relevant? A or B? | Scale (1-9) | Optimized Change Sequence | Optimized Choice and Scale |
| Cost Savings            | Quality of Operations               |                                 |             |                           |                            |
|                         | Time to Market                      |                                 |             |                           |                            |
|                         | Efficiency on Resources Utilization |                                 |             |                           |                            |
| Quality of Operations   | Time to Market                      |                                 |             |                           |                            |
|                         | Efficiency on Resources Utilization |                                 |             |                           |                            |
| Time to Market          | Efficiency on Resources Utilization |                                 |             |                           |                            |

| Compatibility ( C )             |                          |                                 |             |                           |                            |
|---------------------------------|--------------------------|---------------------------------|-------------|---------------------------|----------------------------|
| A                               | B                        | Which is more relevant? A or B? | Scale (1-9) | Optimized Change Sequence | Optimized Choice and Scale |
| IT Infrastructure Compatibility | Company Mission          |                                 |             |                           |                            |
|                                 | Operations compatibility |                                 |             |                           |                            |
| Company Mission                 | Operations compatibility |                                 |             |                           |                            |

| Complexity (CX)               |                                  |                                 |             |                           |                            |
|-------------------------------|----------------------------------|---------------------------------|-------------|---------------------------|----------------------------|
| A                             | B                                | Which is more relevant? A or B? | Scale (1-9) | Optimized Change Sequence | Optimized Choice and Scale |
| Migration Complexity          | Skills Complexity                |                                 |             |                           |                            |
|                               | User Satisfaction Level          |                                 |             |                           |                            |
|                               | Data Security                    |                                 |             |                           |                            |
| Skills Complexity             | User Satisfaction Level          |                                 |             |                           |                            |
|                               | Data Security                    |                                 |             |                           |                            |
| User Satisfaction Level       | Data Security                    |                                 |             |                           |                            |
| Technology Readiness (TR)     |                                  |                                 |             |                           |                            |
| A                             | B                                | Which is more relevant? A or B? | Scale (1-9) |                           |                            |
| IT Infrastructure Maturity    | Managerial and Technical skills  |                                 |             |                           |                            |
| Organization Size (OS)        |                                  |                                 |             |                           |                            |
| A                             | B                                | Which is more relevant? A or B? | Scale (1-9) |                           |                            |
| Number of Employees           | Financial Investments            |                                 |             |                           |                            |
| Organization Competency (OC)  |                                  |                                 |             |                           |                            |
| A                             | B                                | Which is more relevant? A or B? | Scale (1-9) |                           |                            |
| Available Cloud ERP Knowledge | Company Culture                  |                                 |             |                           |                            |
| Top Management Support (TMS)  |                                  |                                 |             |                           |                            |
| A                             | B                                | Which is more relevant? A or B? | Scale (1-9) | Optimized Change Sequence | Optimized Choice and Scale |
| Middle management Support     | Top Management Leadership        |                                 |             |                           |                            |
|                               | Top Management Risk Acceptance   |                                 |             |                           |                            |
| Top Management Leadership     | Top Management Risk Acceptance   |                                 |             |                           |                            |
| Competitive Pressure (CP)     |                                  |                                 |             |                           |                            |
| A                             | B                                | Which is more relevant? A or B? | Scale (1-9) | Optimized Change Sequence | Optimized Choice and Scale |
| Price Competition             | Quality Competition              |                                 |             |                           |                            |
|                               | Competitors Status               |                                 |             |                           |                            |
| Quality Competition           | Competitors Status               |                                 |             |                           |                            |
| Regulatory Compliance (RC)    |                                  |                                 |             |                           |                            |
| A                             | B                                | Which is more relevant? A or B? | Scale (1-9) |                           |                            |
| Government Incentives         | Current Law Protection           |                                 |             |                           |                            |
| Vendor Support (VS)           |                                  |                                 |             |                           |                            |
| A                             | B                                | Which is more relevant? A or B? | Scale (1-9) | Optimized Change Sequence | Optimized Choice and Scale |
| Vendor Technical Support      | Vendor Skilled Resources         |                                 |             |                           |                            |
|                               | Vendor Cloud ERP Training Skills |                                 |             |                           |                            |
| Vendor Skilled Resources      | Vendor Cloud ERP Training Skills |                                 |             |                           |                            |

View Reports

Decision Model page based on the survey results for every sub-attribute:

[illegible]

| Top Management Risk Acceptance |             |                                 |             |                           | Consistency Ratio (CR): <span style="color: green;">✔ 10%</span> | The selection is spot on!                                                                                          |
|--------------------------------|-------------|---------------------------------|-------------|---------------------------|------------------------------------------------------------------|--------------------------------------------------------------------------------------------------------------------|
| A                              | B           | Which is more relevant? A or B? | Scale (1-9) | Optimized Change Sequence | Optimized Choice and Scale                                       | Logic check                                                                                                        |
| Public                         | Private     | B                               | 7           |                           |                                                                  | For Top Management Risk Acceptance purpose, Private has a very strong importance when compared to Public.          |
|                                | Hybrid      | B                               | 5           |                           |                                                                  | For Top Management Risk Acceptance purpose, Hybrid has a stronger importance when compared to Public.              |
|                                | Community   | A                               | 3           |                           |                                                                  | For Top Management Risk Acceptance purpose, Public has a moderate importance when compared to Community.           |
|                                | On Premises | A                               | 4           |                           |                                                                  | For Top Management Risk Acceptance purpose, Public has a moderate plus importance when compared to On Premises.    |
| Private                        | Hybrid      | A                               | 3           |                           |                                                                  | For Top Management Risk Acceptance purpose, Private has a moderate importance when compared to Hybrid.             |
|                                | Community   | A                               | 9           |                           |                                                                  | For Top Management Risk Acceptance purpose, Private has an extreme importance when compared to Community.          |
|                                | On Premises | A                               | 9           |                           |                                                                  | For Top Management Risk Acceptance purpose, Private has an extreme importance when compared to On Premises.        |
| Hybrid                         | Community   | A                               | 7           |                           |                                                                  | For Top Management Risk Acceptance purpose, Hybrid has a very strong importance when compared to Community.        |
|                                | On Premises | A                               | 9           |                           |                                                                  | For Top Management Risk Acceptance purpose, Hybrid has an extreme importance when compared to On Premises.         |
| Community                      | On Premises | A                               | 9           |                           |                                                                  | For Top Management Risk Acceptance purpose, Community has an extreme importance when compared to On Premises.      |
|                                | On Premises | A                               | 4           |                           |                                                                  | For Top Management Risk Acceptance purpose, Community has a moderate plus importance when compared to On Premises. |

| Competitors Status |             |                                 |             |                           | Consistency Ratio (CR): <span style="color: green;">✔ 10%</span> | The selection is spot on!                                                                              |
|--------------------|-------------|---------------------------------|-------------|---------------------------|------------------------------------------------------------------|--------------------------------------------------------------------------------------------------------|
| A                  | B           | Which is more relevant? A or B? | Scale [1-9] | Optimized Change Sequence | Optimized Choice and Scale                                       | Logic check                                                                                            |
| Public             | Private     | B                               | 7           |                           |                                                                  | For Competitors Status purpose, Private has a very strong importance when compared to Public.          |
|                    | Hybrid      | B                               | 5           |                           |                                                                  | For Competitors Status purpose, Hybrid has a stronger importance when compared to Public.              |
|                    | Community   | A                               | 3           |                           |                                                                  | For Competitors Status purpose, Public has a moderate importance when compared to Community.           |
|                    | On Premises | A                               | 4           |                           |                                                                  | For Competitors Status purpose, Public has a moderate plus importance when compared to On Premises.    |
| Private            | Hybrid      | A                               | 3           |                           |                                                                  | For Competitors Status purpose, Private has a moderate importance when compared to Hybrid.             |
|                    | Community   | A                               | 9           |                           |                                                                  | For Competitors Status purpose, Private has an extreme importance when compared to Community.          |
| Hybrid             | On Premises | A                               | 9           |                           |                                                                  | For Competitors Status purpose, Private has an extreme importance when compared to On Premises.        |
|                    | Community   | A                               | 7           |                           |                                                                  | For Competitors Status purpose, Hybrid has a very strong importance when compared to Community.        |
| Community          | On Premises | A                               | 9           |                           |                                                                  | For Competitors Status purpose, Hybrid has an extreme importance when compared to On Premises.         |
|                    | On Premises | A                               | 4           |                           |                                                                  | For Competitors Status purpose, Community has a moderate plus importance when compared to On Premises. |

| Government Incentives               |                 |                                 |             |                           | Consistency Ratio (CR): <input checked="" type="checkbox"/> 10% | The selection is spot on!                                                                                     |
|-------------------------------------|-----------------|---------------------------------|-------------|---------------------------|-----------------------------------------------------------------|---------------------------------------------------------------------------------------------------------------|
| A                                   | Q               | Which is more relevant? A or B? | Scale (1-9) | Optimized Change Sequence | Optimized Choice and Scale                                      | Logic check                                                                                                   |
| Public                              | Private         | B                               | 5           |                           |                                                                 | For Government Incentives purpose, Private has a very strong importance when compared to Public.              |
|                                     | Hybrid          | B                               | 7           |                           |                                                                 | For Government Incentives purpose, Hybrid has a stronger importance when compared to Public.                  |
|                                     | Community       | A                               | 3           |                           |                                                                 | For Government Incentives purpose, Public has a moderate importance when compared to Community.               |
| Private                             | On Premises     | A                               | 4           |                           |                                                                 | For Government Incentives purpose, Public has a moderate plus importance when compared to On Premises.        |
|                                     | Hybrid          | A                               | 3           |                           |                                                                 | For Government Incentives purpose, Private has a moderate importance when compared to Hybrid.                 |
|                                     | Community       | A                               | 9           |                           |                                                                 | For Government Incentives purpose, Private has an extreme importance when compared to Community.              |
| Hybrid                              | On Premises     | A                               | 9           |                           |                                                                 | For Government Incentives purpose, Private has an extreme importance when compared to On Premises.            |
|                                     | Community       | A                               | 7           |                           |                                                                 | For Government Incentives purpose, Hybrid has a very strong importance when compared to Community.            |
|                                     | On Premises     | A                               | 9           |                           |                                                                 | For Government Incentives purpose, Hybrid has an extreme importance when compared to On Premises.             |
| Community                           | On Premises     | A                               | 4           |                           |                                                                 | For Government Incentives purpose, Community has a moderate plus importance when compared to On Premises.     |
|                                     | On Premises     | A                               | 9           |                           |                                                                 | For Government Incentives purpose, Community has a moderate plus importance when compared to On Prem          |
| Current Law Protection              |                 |                                 |             |                           | Consistency Ratio (CR): <input checked="" type="checkbox"/> 10% | The selection is spot on!                                                                                     |
| A                                   | Q               | Which is more relevant? A or B? | Scale (1-9) | Optimized Change Sequence | Optimized Choice and Scale                                      | Logic check                                                                                                   |
| Public                              | Private         | B                               | 5           |                           |                                                                 | For Current Law Protection purpose, Private has a very strong importance when compared to Public.             |
|                                     | Hybrid          | B                               | 7           |                           |                                                                 | For Current Law Protection purpose, Hybrid has a stronger importance when compared to Public.                 |
|                                     | Community       | A                               | 3           |                           |                                                                 | For Current Law Protection purpose, Public has a moderate importance when compared to Community.              |
| Private                             | On Premises     | A                               | 4           |                           |                                                                 | For Current Law Protection purpose, Public has a moderate plus importance when compared to On Premises.       |
|                                     | Hybrid          | A                               | 3           |                           |                                                                 | For Current Law Protection purpose, Private has a moderate importance when compared to Hybrid.                |
|                                     | Community       | A                               | 9           |                           |                                                                 | For Current Law Protection purpose, Private has an extreme importance when compared to Community.             |
| Hybrid                              | On Premises     | A                               | 9           |                           |                                                                 | For Current Law Protection purpose, Private has an extreme importance when compared to On Premises.           |
|                                     | Community       | A                               | 7           |                           |                                                                 | For Current Law Protection purpose, Hybrid has a very strong importance when compared to Community.           |
|                                     | On Premises     | A                               | 9           |                           |                                                                 | For Current Law Protection purpose, Hybrid has an extreme importance when compared to On Premises.            |
| Community                           | On Premises     | A                               | 4           |                           |                                                                 | For Current Law Protection purpose, Community has a moderate plus importance when compared to On Prem         |
|                                     | On Premises     | A                               | 9           |                           |                                                                 | For Current Law Protection purpose, Community has a moderate plus importance when compared to On Prem         |
| Vendor Technical Support            |                 |                                 |             |                           | Consistency Ratio (CR): <input checked="" type="checkbox"/> 10% | The selection is spot on!                                                                                     |
| A                                   | Q               | Which is more relevant? A or B? | Scale (1-9) | Optimized Change Sequence | Optimized Choice and Scale                                      | Logic check                                                                                                   |
| Public                              | Private         | B                               | 7           |                           |                                                                 | For Vendor Technical Support purpose, Private has a very strong importance when compared to Public.           |
|                                     | Hybrid          | B                               | 5           |                           |                                                                 | For Vendor Technical Support purpose, Hybrid has a stronger importance when compared to Public.               |
|                                     | Community       | A                               | 3           |                           |                                                                 | For Vendor Technical Support purpose, Public has a moderate importance when compared to Community.            |
| Private                             | On Premises     | A                               | 4           |                           |                                                                 | For Vendor Technical Support purpose, Public has a moderate plus importance when compared to On Premises.     |
|                                     | Hybrid          | A                               | 3           |                           |                                                                 | For Vendor Technical Support purpose, Private has a moderate importance when compared to Hybrid.              |
|                                     | Community       | A                               | 9           |                           |                                                                 | For Vendor Technical Support purpose, Private has an extreme importance when compared to Community.           |
| Hybrid                              | On Premises     | A                               | 9           |                           |                                                                 | For Vendor Technical Support purpose, Private has an extreme importance when compared to On Premises.         |
|                                     | Community       | A                               | 7           |                           |                                                                 | For Vendor Technical Support purpose, Hybrid has a very strong importance when compared to Community.         |
|                                     | On Premises     | A                               | 9           |                           |                                                                 | For Vendor Technical Support purpose, Hybrid has an extreme importance when compared to On Premises.          |
| Community                           | On Premises     | A                               | 4           |                           |                                                                 | For Vendor Technical Support purpose, Community has a moderate plus importance when compared to On Ph         |
|                                     | On Premises     | A                               | 9           |                           |                                                                 | For Vendor Technical Support purpose, Community has a moderate plus importance when compared to On Ph         |
| Vendor Skilled Resources            |                 |                                 |             |                           | Consistency Ratio (CR): <input checked="" type="checkbox"/> 10% | The selection is spot on!                                                                                     |
| A                                   | Q               | Which is more relevant? A or B? | Scale (1-9) | Optimized Change Sequence | Optimized Choice and Scale                                      | Logic check                                                                                                   |
| Public                              | Private         | B                               | 7           |                           |                                                                 | For Vendor Skilled Resources purpose, Private has a very strong importance when compared to Public.           |
|                                     | Hybrid          | B                               | 5           |                           |                                                                 | For Vendor Skilled Resources purpose, Hybrid has a stronger importance when compared to Public.               |
|                                     | Community       | A                               | 3           |                           |                                                                 | For Vendor Skilled Resources purpose, Public has a moderate importance when compared to Community.            |
| Private                             | On Premises     | A                               | 4           |                           |                                                                 | For Vendor Skilled Resources purpose, Public has a moderate plus importance when compared to On Premises.     |
|                                     | Hybrid          | A                               | 3           |                           |                                                                 | For Vendor Skilled Resources purpose, Private has a moderate importance when compared to Hybrid.              |
|                                     | Community       | A                               | 9           |                           |                                                                 | For Vendor Skilled Resources purpose, Private has an extreme importance when compared to Community.           |
| Hybrid                              | On Premises     | A                               | 9           |                           |                                                                 | For Vendor Skilled Resources purpose, Private has an extreme importance when compared to On Premises.         |
|                                     | Community       | A                               | 7           |                           |                                                                 | For Vendor Skilled Resources purpose, Hybrid has a very strong importance when compared to Community.         |
|                                     | On Premises     | A                               | 9           |                           |                                                                 | For Vendor Skilled Resources purpose, Hybrid has an extreme importance when compared to On Premises.          |
| Community                           | On Premises     | A                               | 4           |                           |                                                                 | For Vendor Skilled Resources purpose, Community has an extreme importance when compared to On Premises.       |
|                                     | On Premises     | A                               | 9           |                           |                                                                 | For Vendor Skilled Resources purpose, Community has a moderate plus importance when compared to On Pre        |
| Vendor Cloud ERP Training Skills    |                 |                                 |             |                           | Consistency Ratio (CR): <input checked="" type="checkbox"/> 10% | The selection is spot on!                                                                                     |
| A                                   | Q               | Which is more relevant? A or B? | Scale (1-9) | Optimized Change Sequence | Optimized Choice and Scale                                      | Logic check                                                                                                   |
| Public                              | Private         | B                               | 7           |                           |                                                                 | For Vendor Cloud ERP Training Skills purpose, Private has a very strong importance when compared to Public.   |
|                                     | Hybrid          | B                               | 5           |                           |                                                                 | For Vendor Cloud ERP Training Skills purpose, Hybrid has a stronger importance when compared to Public.       |
|                                     | Community       | A                               | 3           |                           |                                                                 | For Vendor Cloud ERP Training Skills purpose, Public has a moderate importance when compared to Community.    |
| Private                             | On Premises     | A                               | 4           |                           |                                                                 | For Vendor Cloud ERP Training Skills purpose, Public has a moderate plus importance when compared to On Ph    |
|                                     | Hybrid          | A                               | 3           |                           |                                                                 | For Vendor Cloud ERP Training Skills purpose, Private has a moderate importance when compared to Hybrid.      |
|                                     | Community       | A                               | 9           |                           |                                                                 | For Vendor Cloud ERP Training Skills purpose, Private has an extreme importance when compared to Community.   |
| Hybrid                              | On Premises     | A                               | 9           |                           |                                                                 | For Vendor Cloud ERP Training Skills purpose, Private has an extreme importance when compared to On Prem      |
|                                     | Community       | A                               | 7           |                           |                                                                 | For Vendor Cloud ERP Training Skills purpose, Hybrid has a very strong importance when compared to Commu      |
|                                     | On Premises     | A                               | 9           |                           |                                                                 | For Vendor Cloud ERP Training Skills purpose, Hybrid has an extreme importance when compared to On Prem       |
| Community                           | On Premises     | A                               | 4           |                           |                                                                 | For Vendor Cloud ERP Training Skills purpose, Community has a moderate plus importance when compared to       |
|                                     | On Premises     | A                               | 9           |                           |                                                                 | For Vendor Cloud ERP Training Skills purpose, Community has a moderate plus importance when compared to       |
| CLOUD SERVICE TYPE                  |                 |                                 |             |                           |                                                                 |                                                                                                               |
| Cost Savings                        |                 |                                 |             |                           | Consistency Ratio (CR): <input checked="" type="checkbox"/> 4%  | The selection is spot on!                                                                                     |
| A                                   | Q               | Which is more relevant? A or B? | Scale (1-9) | Optimized Change Sequence | Optimized Choice and Scale                                      | Logic check                                                                                                   |
| IaaS                                | PaaS            | B                               | 2           |                           |                                                                 | For Cost Savings purpose, PaaS has a weaker importance when compared to IaaS.                                 |
|                                     | SaaS            | B                               | 2           |                           |                                                                 | For Cost Savings purpose, SaaS has a weaker importance when compared to IaaS.                                 |
|                                     | Traditional ERP | A                               | 9           |                           |                                                                 | For Cost Savings purpose, IaaS has an extreme importance when compared to Traditional ERP.                    |
| PaaS                                | SaaS            | A                               | 7           |                           |                                                                 | For Cost Savings purpose, PaaS has an equal important when compared to SaaS.                                  |
|                                     | Traditional ERP | A                               | 7           |                           |                                                                 | For Cost Savings purpose, PaaS has a very strong importance when compared to Traditional ERP.                 |
|                                     | Traditional ERP | A                               | 7           |                           |                                                                 | For Cost Savings purpose, SaaS has a very strong importance when compared to Traditional ERP.                 |
| SaaS                                | Traditional ERP | A                               |             |                           |                                                                 |                                                                                                               |
|                                     | Traditional ERP | A                               |             |                           |                                                                 |                                                                                                               |
|                                     | Traditional ERP | A                               |             |                           |                                                                 |                                                                                                               |
| Quality of Operations               |                 |                                 |             |                           | Consistency Ratio (CR): <input checked="" type="checkbox"/> 4%  | The selection is spot on!                                                                                     |
| A                                   | Q               | Which is more relevant? A or B? | Scale (1-9) | Optimized Change Sequence | Optimized Choice and Scale                                      | Logic check                                                                                                   |
| IaaS                                | PaaS            | B                               | 2           |                           |                                                                 | For Quality of Operations purpose, PaaS has a weaker importance when compared to IaaS.                        |
|                                     | SaaS            | B                               | 2           |                           |                                                                 | For Quality of Operations purpose, SaaS has a weaker importance when compared to IaaS.                        |
|                                     | Traditional ERP | A                               | 9           |                           |                                                                 | For Quality of Operations purpose, IaaS has an extreme importance when compared to Traditional ERP.           |
| PaaS                                | SaaS            | A                               | 1           |                           |                                                                 | For Quality of Operations purpose, PaaS has an equal important when compared to SaaS.                         |
|                                     | Traditional ERP | A                               | 7           |                           |                                                                 | For Quality of Operations purpose, PaaS has a very strong importance when compared to Traditional ERP.        |
|                                     | Traditional ERP | A                               | 7           |                           |                                                                 | For Quality of Operations purpose, SaaS has a very strong importance when compared to Traditional ERP.        |
| SaaS                                | Traditional ERP | A                               |             |                           |                                                                 |                                                                                                               |
|                                     | Traditional ERP | A                               |             |                           |                                                                 |                                                                                                               |
|                                     | Traditional ERP | A                               |             |                           |                                                                 |                                                                                                               |
| Time to Market                      |                 |                                 |             |                           | Consistency Ratio (CR): <input checked="" type="checkbox"/> 4%  | The selection is spot on!                                                                                     |
| A                                   | Q               | Which is more relevant? A or B? | Scale (1-9) | Optimized Change Sequence | Optimized Choice and Scale                                      | Logic check                                                                                                   |
| IaaS                                | PaaS            | B                               | 2           |                           |                                                                 | For Time to Market purpose, PaaS has a weaker importance when compared to IaaS.                               |
|                                     | SaaS            | B                               | 2           |                           |                                                                 | For Time to Market purpose, SaaS has a weaker importance when compared to IaaS.                               |
|                                     | Traditional ERP | A                               | 9           |                           |                                                                 | For Time to Market purpose, IaaS has an extreme importance when compared to Traditional ERP.                  |
| PaaS                                | SaaS            | A                               | 1           |                           |                                                                 | For Time to Market purpose, PaaS has an equal important when compared to SaaS.                                |
|                                     | Traditional ERP | A                               | 7           |                           |                                                                 | For Time to Market purpose, PaaS has a very strong importance when compared to Traditional ERP.               |
|                                     | Traditional ERP | A                               | 7           |                           |                                                                 | For Time to Market purpose, SaaS has a very strong importance when compared to Traditional ERP.               |
| SaaS                                | Traditional ERP | A                               |             |                           |                                                                 |                                                                                                               |
|                                     | Traditional ERP | A                               |             |                           |                                                                 |                                                                                                               |
|                                     | Traditional ERP | A                               |             |                           |                                                                 |                                                                                                               |
| Efficiency on Resources Utilization |                 |                                 |             |                           | Consistency Ratio (CR): <input checked="" type="checkbox"/> 4%  | The selection is spot on!                                                                                     |
| A                                   | Q               | Which is more relevant? A or B? | Scale (1-9) | Optimized Change Sequence | Optimized Choice and Scale                                      | Logic check                                                                                                   |
| IaaS                                | PaaS            | B                               | 2           |                           |                                                                 | For Efficiency on Resources Utilization purpose, PaaS has a weaker importance when compared to IaaS.          |
|                                     | SaaS            | B                               | 2           |                           |                                                                 | For Efficiency on Resources Utilization purpose, SaaS has a weaker importance when compared to IaaS.          |
|                                     | Traditional ERP | A                               | 9           |                           |                                                                 | For Efficiency on Resources Utilization purpose, IaaS has an extreme importance when compared to Traditiona   |
| PaaS                                | SaaS            | A                               | 1           |                           |                                                                 | For Efficiency on Resources Utilization purpose, PaaS has an equal important when compared to SaaS.           |
|                                     | Traditional ERP | A                               | 7           |                           |                                                                 | For Efficiency on Resources Utilization purpose, PaaS has a very strong importance when compared to Tradition |
|                                     | Traditional ERP | A                               | 7           |                           |                                                                 | For Efficiency on Resources Utilization purpose, SaaS has a very strong importance when compared to Tradition |
| SaaS                                | Traditional ERP | A                               |             |                           |                                                                 |                                                                                                               |
|                                     | Traditional ERP | A                               |             |                           |                                                                 |                                                                                                               |
|                                     | Traditional ERP | A                               |             |                           |                                                                 |                                                                                                               |
| IT Infrastructure Compatibility     |                 |                                 |             |                           | Consistency Ratio (CR): <input checked="" type="checkbox"/> 4%  | The selection is spot on!                                                                                     |
| A                                   | Q               | Which is more relevant? A or B? | Scale (1-9) | Optimized Change Sequence | Optimized Choice and Scale                                      | Logic check                                                                                                   |
| IaaS                                | PaaS            | B                               | 2           |                           |                                                                 | For IT Infrastructure Compatibility purpose, PaaS has a weaker importance when compared to IaaS.              |
|                                     | SaaS            | B                               | 2           |                           |                                                                 | For IT Infrastructure Compatibility purpose, SaaS has a weaker importance when compared to IaaS.              |
|                                     | Traditional ERP | A                               | 1           |                           |                                                                 | For IT Infrastructure Compatibility purpose, IaaS has an extreme importance when compared to Traditional ERP  |
| PaaS                                | SaaS            | A                               | 1           |                           |                                                                 | For IT Infrastructure Compatibility purpose, PaaS has an equal important when compared to SaaS.               |
|                                     | Traditional ERP | A                               | 7           |                           |                                                                 | For IT Infrastructure Compatibility purpose, PaaS has a very strong importance when compared to Traditional   |
|                                     | Traditional ERP | A                               | 7           |                           |                                                                 | For IT Infrastructure Compatibility purpose, SaaS has a very strong importance when compared to Traditional   |
| SaaS                                | Traditional ERP | A                               |             |                           |                                                                 |                                                                                                               |
|                                     | Traditional ERP | A                               |             |                           |                                                                 |                                                                                                               |
|                                     | Traditional ERP | A                               |             |                           |                                                                 |                                                                                                               |

| Company Mission            |                 |                                 |             |                           | Consistency Ratio (CR):    | <div><div></div><div>4%</div></div>                                                                       | The selection is spot on! |
|----------------------------|-----------------|---------------------------------|-------------|---------------------------|----------------------------|-----------------------------------------------------------------------------------------------------------|---------------------------|
| A                          | B               | Which is more relevant? A or B? | Scale (1-9) | Optimized Change Sequence | Optimized Choice and Scale | Logic check                                                                                               |                           |
| IaaS                       | PaaS            | B                               | 2           |                           |                            | For Company Mission purpose, PaaS has a weaker importance when compared to IaaS.                          |                           |
|                            | SaaS            | B                               | 2           |                           |                            | For Company Mission purpose, SaaS has a weaker importance when compared to IaaS.                          |                           |
|                            | Traditional ERP | A                               | 9           |                           |                            | For Company Mission purpose, IaaS has an extreme importance when compared to Traditional ERP.             |                           |
| PaaS                       | SaaS            | A                               | 1           |                           |                            | For Company Mission purpose, PaaS has an equal important when compared to SaaS.                           |                           |
|                            | Traditional ERP | A                               | 7           |                           |                            | For Company Mission purpose, PaaS has a very strong importance when compared to Traditional ERP.          |                           |
| SaaS                       | Traditional ERP | A                               | 7           |                           |                            | For Company Mission purpose, SaaS has a very strong importance when compared to Traditional ERP.          |                           |
| Operations compatibility   |                 |                                 |             |                           | Consistency Ratio (CR):    | <div><div></div><div>4%</div></div>                                                                       | The selection is spot on! |
| A                          | B               | Which is more relevant? A or B? | Scale (1-9) | Optimized Change Sequence | Optimized Choice and Scale | Logic check                                                                                               |                           |
| IaaS                       | PaaS            | B                               | 2           |                           |                            | For Operations compatibility purpose, PaaS has a weaker importance when compared to IaaS.                 |                           |
|                            | SaaS            | B                               | 2           |                           |                            | For Operations compatibility purpose, SaaS has a weaker importance when compared to IaaS.                 |                           |
|                            | Traditional ERP | A                               | 9           |                           |                            | For Operations compatibility purpose, IaaS has an extreme importance when compared to Traditional ERP.    |                           |
| PaaS                       | SaaS            | A                               | 1           |                           |                            | For Operations compatibility purpose, PaaS has an equal important when compared to SaaS.                  |                           |
|                            | Traditional ERP | A                               | 7           |                           |                            | For Operations compatibility purpose, PaaS has a very strong importance when compared to Traditional ERP. |                           |
| SaaS                       | Traditional ERP | A                               | 7           |                           |                            | For Operations compatibility purpose, SaaS has a very strong importance when compared to Traditional ERP. |                           |
| Migration Complexity       |                 |                                 |             |                           | Consistency Ratio (CR):    | <div><div></div><div>4%</div></div>                                                                       | The selection is spot on! |
| A                          | B               | Which is more relevant? A or B? | Scale (1-9) | Optimized Change Sequence | Optimized Choice and Scale | Logic check                                                                                               |                           |
| IaaS                       | PaaS            | B                               | 2           |                           |                            | For Migration Complexity purpose, PaaS has a weaker importance when compared to IaaS.                     |                           |
|                            | SaaS            | B                               | 2           |                           |                            | For Migration Complexity purpose, SaaS has a weaker importance when compared to IaaS.                     |                           |
|                            | Traditional ERP | A                               | 9           |                           |                            | For Migration Complexity purpose, IaaS has an extreme importance when compared to Traditional ERP.        |                           |
| PaaS                       | SaaS            | A                               | 1           |                           |                            | For Migration Complexity purpose, PaaS has an equal important when compared to SaaS.                      |                           |
|                            | Traditional ERP | A                               | 7           |                           |                            | For Migration Complexity purpose, PaaS has a very strong importance when compared to Traditional ERP.     |                           |
| SaaS                       | Traditional ERP | A                               | 7           |                           |                            | For Migration Complexity purpose, SaaS has a very strong importance when compared to Traditional ERP.     |                           |
| Skills Complexity          |                 |                                 |             |                           | Consistency Ratio (CR):    | <div><div></div><div>4%</div></div>                                                                       | The selection is spot on! |
| A                          | B               | Which is more relevant? A or B? | Scale (1-9) | Optimized Change Sequence | Optimized Choice and Scale | Logic check                                                                                               |                           |
| IaaS                       | PaaS            | B                               | 2           |                           |                            | For Skills Complexity purpose, PaaS has a weaker importance when compared to IaaS.                        |                           |
|                            | SaaS            | B                               | 2           |                           |                            | For Skills Complexity purpose, SaaS has a weaker importance when compared to IaaS.                        |                           |
|                            | Traditional ERP | A                               | 9           |                           |                            | For Skills Complexity purpose, IaaS has an extreme importance when compared to Traditional ERP.           |                           |
| PaaS                       | SaaS            | A                               | 1           |                           |                            | For Skills Complexity purpose, PaaS has an equal important when compared to SaaS.                         |                           |
|                            | Traditional ERP | A                               | 7           |                           |                            | For Skills Complexity purpose, PaaS has a very strong importance when compared to Traditional ERP.        |                           |
| SaaS                       | Traditional ERP | A                               | 7           |                           |                            | For Skills Complexity purpose, SaaS has a very strong importance when compared to Traditional ERP.        |                           |
| User Satisfaction Level    |                 |                                 |             |                           | Consistency Ratio (CR):    | <div><div></div><div>4%</div></div>                                                                       | The selection is spot on! |
| A                          | B               | Which is more relevant? A or B? | Scale (1-9) | Optimized Change Sequence | Optimized Choice and Scale | Logic check                                                                                               |                           |
| IaaS                       | PaaS            | B                               | 2           |                           |                            | For User Satisfaction Level purpose, PaaS has a weaker importance when compared to IaaS.                  |                           |
|                            | SaaS            | B                               | 2           |                           |                            | For User Satisfaction Level purpose, SaaS has a weaker importance when compared to IaaS.                  |                           |
|                            | Traditional ERP | A                               | 9           |                           |                            | For User Satisfaction Level purpose, IaaS has an extreme importance when compared to Traditional ERP.     |                           |
| PaaS                       | SaaS            | A                               | 1           |                           |                            | For User Satisfaction Level purpose, PaaS has an equal important when compared to SaaS.                   |                           |
|                            | Traditional ERP | A                               | 7           |                           |                            | For User Satisfaction Level purpose, PaaS has a very strong importance when compared to Traditional ERP.  |                           |
| SaaS                       | Traditional ERP | A                               | 7           |                           |                            | For User Satisfaction Level purpose, SaaS has a very strong importance when compared to Traditional ERP.  |                           |
| Data Security              |                 |                                 |             |                           | Consistency Ratio (CR):    | <div><div></div><div>4%</div></div>                                                                       | The selection is spot on! |
| A                          | B               | Which is more relevant? A or B? | Scale (1-9) | Optimized Change Sequence | Optimized Choice and Scale | Logic check                                                                                               |                           |
| IaaS                       | PaaS            | B                               | 2           |                           |                            | For Data Security purpose, PaaS has a weaker importance when compared to IaaS.                            |                           |
|                            | SaaS            | B                               | 2           |                           |                            | For Data Security purpose, SaaS has a weaker importance when compared to IaaS.                            |                           |
|                            | Traditional ERP | A                               | 9           |                           |                            | For Data Security purpose, IaaS has an extreme importance when compared to Traditional ERP.               |                           |
| PaaS                       | SaaS            | A                               | 1           |                           |                            | For Data Security purpose, PaaS has an equal important when compared to SaaS.                             |                           |
|                            | Traditional ERP | A                               | 7           |                           |                            | For Data Security purpose, PaaS has a very strong importance when compared to Traditional ERP.            |                           |
| SaaS                       | Traditional ERP | A                               | 7           |                           |                            | For Data Security purpose, SaaS has a very strong importance when compared to Traditional ERP.            |                           |
| IT Infrastructure Maturity |                 |                                 |             |                           | Consistency Ratio (CR):    | <div><div></div><div>4%</div></div>                                                                       | The selection is spot on! |
| A                          | B               | Which is more relevant? A or B? | Scale (1-9) | Optimized Ranking         | Optimized Choice and Scale |                                                                                                           |                           |

| Number of Employees |                 |                                 |             |                           |                            | Consistency Ratio (CR): 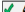 4% The selection is spot on! |
|---------------------|-----------------|---------------------------------|-------------|---------------------------|----------------------------|------------------------------------------------------------------------------------------------------------------------------------------|
| A                   | B               | Which is more relevant? A or B? | Scale [1-9] | Optimized Change Sequence | Optimized Choice and Scale | Logic check                                                                                                                              |
| IaaS                | PaaS            | B                               | 2           |                           |                            | For Number of Employees purpose, PaaS has a weaker importance when compared to IaaS.                                                     |
|                     | SaaS            | B                               | 2           |                           |                            | For Number of Employees purpose, SaaS has a weaker importance when compared to IaaS.                                                     |
|                     | Traditional ERP | A                               | 9           |                           |                            | For Number of Employees purpose, IaaS has an extreme importance when compared to Traditional ERP.                                        |
| PaaS                | SaaS            | A                               | 1           |                           |                            | For Number of Employees purpose, PaaS has an equal important when compared to SaaS.                                                      |
|                     | Traditional ERP | A                               | 7           |                           |                            | For Number of Employees purpose, PaaS has a very strong importance when compared to Traditional ERP.                                     |
| SaaS                | Traditional ERP | A                               | 7           |                           |                            | For Number of Employees purpose, SaaS has a very strong importance when compared to Traditional ERP.                                     |

| Financial Investments |                 |                                 |             |                           |                            | Consistency Ratio (CR): 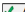 4% The selection is spot on! |
|-----------------------|-----------------|---------------------------------|-------------|---------------------------|----------------------------|------------------------------------------------------------------------------------------------------------------------------------------|
| A                     | B               | Which is more relevant? A or B? | Scale [1-9] | Optimized Change Sequence | Optimized Choice and Scale | Logic check                                                                                                                              |
| IaaS                  | PaaS            | B                               | 2           |                           |                            | For Financial Investments purpose, PaaS has a weaker importance when compared to IaaS.                                                   |
|                       | SaaS            | B                               | 2           |                           |                            | For Financial Investments purpose, SaaS has a weaker importance when compared to IaaS.                                                   |
|                       | Traditional ERP | A                               | 9           |                           |                            | For Financial Investments purpose, IaaS has an extreme importance when compared to Traditional ERP.                                      |
| PaaS                  | SaaS            | A                               | 1           |                           |                            | For Financial Investments purpose, PaaS has an equal important when compared to SaaS.                                                    |
|                       | Traditional ERP | A                               | 7           |                           |                            | For Financial Investments purpose, PaaS has a very strong importance when compared to Traditional ERP.                                   |
| SaaS                  | Traditional ERP | A                               | 7           |                           |                            | For Financial Investments purpose, SaaS has a very strong importance when compared to Traditional ERP.                                   |

| Available Cloud ERP Knowledge |                 |                                 |             |                           |                            | Consistency Ratio (CR): 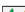 4% The selection is spot on! |
|-------------------------------|-----------------|---------------------------------|-------------|---------------------------|----------------------------|------------------------------------------------------------------------------------------------------------------------------------------|
| A                             | B               | Which is more relevant? A or B? | Scale [1-9] | Optimized Change Sequence | Optimized Choice and Scale | Logic check                                                                                                                              |
| IaaS                          | PaaS            | B                               | 2           |                           |                            | For Available Cloud ERP Knowledge purpose, PaaS has a weaker importance when compared to IaaS.                                           |
|                               | SaaS            | B                               | 2           |                           |                            | For Available Cloud ERP Knowledge purpose, SaaS has a weaker importance when compared to IaaS.                                           |
|                               | Traditional ERP | A                               | 9           |                           |                            | For Available Cloud ERP Knowledge purpose, IaaS has an extreme importance when compared to Traditional ERP.                              |
| PaaS                          | SaaS            | A                               | 1           |                           |                            | For Available Cloud ERP Knowledge purpose, PaaS has an equal important when compared to SaaS.                                            |
|                               | Traditional ERP | A                               | 7           |                           |                            | For Available Cloud ERP Knowledge purpose, PaaS has a very strong importance when compared to Traditional ERP.                           |
| SaaS                          | Traditional ERP | A                               | 7           |                           |                            | For Available Cloud ERP Knowledge purpose, SaaS has a very strong importance when compared to Traditional ERP.                           |

| Company Culture |                 |                                 |             |                           |                            | Consistency Ratio (CR): 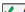 4% The selection is spot on! |
|-----------------|-----------------|---------------------------------|-------------|---------------------------|----------------------------|------------------------------------------------------------------------------------------------------------------------------------------|
| A               | B               | Which is more relevant? A or B? | Scale [1-9] | Optimized Change Sequence | Optimized Choice and Scale | Logic check                                                                                                                              |
| IaaS            | PaaS            | B                               | 2           |                           |                            | For Company Culture purpose, PaaS has a weaker importance when compared to IaaS.                                                         |
|                 | SaaS            | B                               | 2           |                           |                            | For Company Culture purpose, SaaS has a weaker importance when compared to IaaS.                                                         |
|                 | Traditional ERP | A                               | 9           |                           |                            | For Company Culture purpose, IaaS has an extreme importance when compared to Traditional ERP.                                            |
| PaaS            | SaaS            | A                               | 1           |                           |                            | For Company Culture purpose, PaaS has an equal important when compared to SaaS.                                                          |
|                 | Traditional ERP | A                               | 7           |                           |                            | For Company Culture purpose, PaaS has a very strong importance when compared to Traditional ERP.                                         |
| SaaS            | Traditional ERP | A                               | 7           |                           |                            | For Company Culture purpose, SaaS has a very strong importance when compared to Traditional ERP.                                         |

| Middle management Support |                 |                                 |             |                   |                            | Consistency Ratio (CR): 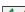 4% The selection is spot on! |
|---------------------------|-----------------|---------------------------------|-------------|-------------------|----------------------------|------------------------------------------------------------------------------------------------------------------------------------------|
| A                         | B               | Which is more relevant? A or B? | Scale [1-9] | Optimized Ranking | Optimized Choice and Scale | Logic check                                                                                                                              |
| IaaS                      | PaaS            | B                               | 2           |                   |                            | For Middle management Support purpose, PaaS has a weaker importance when compared to IaaS.                                               |
|                           | SaaS            | B                               | 2           |                   |                            | For Middle management Support purpose, SaaS has a weaker importance when compared to IaaS.                                               |
|                           | Traditional ERP | A                               | 9           |                   |                            | For Middle management Support purpose, IaaS has an extreme importance when compared to Traditional ERP.                                  |
| PaaS                      | SaaS            | A                               | 1           |                   |                            | For Middle management Support purpose, PaaS has an equal important when compared to SaaS.                                                |
|                           | Traditional ERP | A                               | 7           |                   |                            | For Middle management Support purpose, PaaS has a very strong importance when compared to Traditional ERP.                               |
| SaaS                      | Traditional ERP | A                               | 7           |                   |                            | For Middle management Support purpose, SaaS has a very strong importance when compared to Traditional ERP.                               |

| Top Management Leadership |                 |                                 |             |                           |                            | Consistency Ratio (CR): 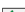 4% The selection is spot on! |
|---------------------------|-----------------|---------------------------------|-------------|---------------------------|----------------------------|--------------------------------------------------------------------------------------------------------------------------------------------|
| A                         | B               | Which is more relevant? A or B? | Scale [1-9] | Optimized Change Sequence | Optimized Choice and Scale | Logic check                                                                                                                                |
| IaaS                      | PaaS            | B                               | 2           |                           |                            | For Top Management Leadership purpose, PaaS has a weaker importance when compared to IaaS.                                                 |
|                           | SaaS            | B                               | 2           |                           |                            | For Top Management Leadership purpose, SaaS has a weaker importance when compared to IaaS.                                                 |
|                           | Traditional ERP | A                               | 9           |                           |                            | For Top Management Leadership purpose, IaaS has an extreme importance when compared to Traditional ERP.                                    |
| PaaS                      | SaaS            | A                               | 1           |                           |                            | For Top Management Leadership purpose, PaaS has an equal important when compared to SaaS.                                                  |
|                           | Traditional ERP | A                               | 7           |                           |                            | For Top Management Leadership purpose, PaaS has a very strong importance when compared to Traditional ERP.                                 |
| SaaS                      | Traditional ERP | A                               | 7           |                           |                            | For Top Management Leadership purpose, SaaS has a very strong importance when compared to Traditional ERP.                                 |

| Top Management Risk Acceptance |                 |                                 |             |                           |                            | Consistency Ratio (CR): 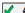 4% The selection is spot on! |
|--------------------------------|-----------------|---------------------------------|-------------|---------------------------|----------------------------|--------------------------------------------------------------------------------------------------------------------------------------------|
| A                              | B               | Which is more relevant? A or B? | Scale [1-9] | Optimized Change Sequence | Optimized Choice and Scale | Logic check                                                                                                                                |
| IaaS                           | PaaS            | B                               | 2           |                           |                            | For Top Management Risk Acceptance purpose, PaaS has a weaker importance when compared to IaaS.                                            |
|                                | SaaS            | B                               | 2           |                           |                            | For Top Management Risk Acceptance purpose, SaaS has a weaker importance when compared to IaaS.                                            |
|                                | Traditional ERP | A                               | 9           |                           |                            | For Top Management Risk Acceptance purpose, IaaS has an extreme importance when compared to Traditional ERP.                               |
| PaaS                           | SaaS            | A                               | 1           |                           |                            | For Top Management Risk Acceptance purpose, PaaS has an equal important when compared to SaaS.                                             |
|                                | Traditional ERP | A                               | 7           |                           |                            | For Top Management Risk Acceptance purpose, PaaS has a very strong importance when compared to Traditional ERP.                            |
| SaaS                           | Traditional ERP | A                               | 7           |                           |                            | For Top Management Risk Acceptance purpose, SaaS has a very strong importance when compared to Traditional ERP.                            |

| Price Competition |                 |                                 |             |                           |                            | Consistency Ratio (CR): 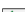 4% The selection is spot on! |
|-------------------|-----------------|---------------------------------|-------------|---------------------------|----------------------------|--------------------------------------------------------------------------------------------------------------------------------------------|
| A                 | B               | Which is more relevant? A or B? | Scale [1-9] | Optimized Change Sequence | Optimized Choice and Scale | Logic check                                                                                                                                |
| IaaS              | PaaS            | B                               | 2           |                           |                            | For Price Competition purpose, PaaS has a weaker importance when compared to IaaS.                                                         |
|                   | SaaS            | B                               | 2           |                           |                            | For Price Competition purpose, SaaS has a weaker importance when compared to IaaS.                                                         |
|                   | Traditional ERP | A                               | 9           |                           |                            | For Price Competition purpose, IaaS has an extreme importance when compared to Traditional ERP.                                            |
| PaaS              | SaaS            | A                               | 1           |                           |                            | For Price Competition purpose, PaaS has an equal important when compared to SaaS.                                                          |
|                   | Traditional ERP | A                               | 7           |                           |                            | For Price Competition purpose, PaaS has a very strong importance when compared to Traditional ERP.                                         |
| SaaS              | Traditional ERP | A                               | 7           |                           |                            | For Price Competition purpose, SaaS has a very strong importance when compared to Traditional ERP.                                         |

| Quality Competition              |                 |                                 |             |                           | Consistency Ratio (CR): <input checked="" type="checkbox"/> 4% The selection is spot on!                                                                                                                                                                                                                                                                                                                                                                                                                                                                                                                                                                                              |
|----------------------------------|-----------------|---------------------------------|-------------|---------------------------|---------------------------------------------------------------------------------------------------------------------------------------------------------------------------------------------------------------------------------------------------------------------------------------------------------------------------------------------------------------------------------------------------------------------------------------------------------------------------------------------------------------------------------------------------------------------------------------------------------------------------------------------------------------------------------------|
| A                                | B               | Which is more relevant? A or B? | Scale (1-9) | Optimized Change Sequence | Optimized Choice and Scale                                                                                                                                                                                                                                                                                                                                                                                                                                                                                                                                                                                                                                                            |
| IaaS                             | PaaS            | B                               | 2           |                           | Logic check<br>For Quality Competition purpose, PaaS has a weaker importance when compared to IaaS.<br>For Quality Competition purpose, SaaS has a weaker importance when compared to IaaS.<br>For Quality Competition purpose, IaaS has an extreme importance when compared to Traditional ERP.<br>For Quality Competition purpose, PaaS has an equal important when compared to SaaS.<br>For Quality Competition purpose, PaaS has a very strong importance when compared to Traditional ERP.<br>For Quality Competition purpose, SaaS has a very strong importance when compared to Traditional ERP.                                                                               |
|                                  | SaaS            | B                               | 2           |                           |                                                                                                                                                                                                                                                                                                                                                                                                                                                                                                                                                                                                                                                                                       |
|                                  | Traditional ERP | A                               | 9           |                           |                                                                                                                                                                                                                                                                                                                                                                                                                                                                                                                                                                                                                                                                                       |
| PaaS                             | SaaS            | A                               | 1           |                           |                                                                                                                                                                                                                                                                                                                                                                                                                                                                                                                                                                                                                                                                                       |
|                                  | Traditional ERP | A                               | 7           |                           |                                                                                                                                                                                                                                                                                                                                                                                                                                                                                                                                                                                                                                                                                       |
| SaaS                             | Traditional ERP | A                               | 7           |                           |                                                                                                                                                                                                                                                                                                                                                                                                                                                                                                                                                                                                                                                                                       |
| Competitors Status               |                 |                                 |             |                           | Consistency Ratio (CR): <input checked="" type="checkbox"/> 4% The selection is spot on!                                                                                                                                                                                                                                                                                                                                                                                                                                                                                                                                                                                              |
| A                                | B               | Which is more relevant? A or B? | Scale (1-9) | Optimized Change Sequence | Optimized Choice and Scale                                                                                                                                                                                                                                                                                                                                                                                                                                                                                                                                                                                                                                                            |
| IaaS                             | PaaS            | B                               | 2           |                           | Logic check<br>For Competitors Status purpose, PaaS has a weaker importance when compared to IaaS.<br>For Competitors Status purpose, SaaS has a weaker importance when compared to IaaS.<br>For Competitors Status purpose, IaaS has an extreme importance when compared to Traditional ERP.<br>For Competitors Status purpose, PaaS has an equal important when compared to SaaS.<br>For Competitors Status purpose, PaaS has a very strong importance when compared to Traditional ERP.<br>For Competitors Status purpose, SaaS has a very strong importance when compared to Traditional ERP.                                                                                     |
|                                  | SaaS            | B                               | 2           |                           |                                                                                                                                                                                                                                                                                                                                                                                                                                                                                                                                                                                                                                                                                       |
|                                  | Traditional ERP | A                               | 9           |                           |                                                                                                                                                                                                                                                                                                                                                                                                                                                                                                                                                                                                                                                                                       |
| PaaS                             | SaaS            | A                               | 1           |                           |                                                                                                                                                                                                                                                                                                                                                                                                                                                                                                                                                                                                                                                                                       |
|                                  | Traditional ERP | A                               | 7           |                           |                                                                                                                                                                                                                                                                                                                                                                                                                                                                                                                                                                                                                                                                                       |
| SaaS                             | Traditional ERP | A                               | 7           |                           |                                                                                                                                                                                                                                                                                                                                                                                                                                                                                                                                                                                                                                                                                       |
| Government Incentives            |                 |                                 |             |                           | Consistency Ratio (CR): <input checked="" type="checkbox"/> 4% The selection is spot on!                                                                                                                                                                                                                                                                                                                                                                                                                                                                                                                                                                                              |
| A                                | B               | Which is more relevant? A or B? | Scale (1-9) | Optimized Change Sequence | Optimized Choice and Scale                                                                                                                                                                                                                                                                                                                                                                                                                                                                                                                                                                                                                                                            |
| IaaS                             | PaaS            | B                               | 2           |                           | Logic check<br>For Government Incentives purpose, PaaS has a weaker importance when compared to IaaS.<br>For Government Incentives purpose, SaaS has a weaker importance when compared to IaaS.<br>For Government Incentives purpose, IaaS has an extreme importance when compared to Traditional ERP.<br>For Government Incentives purpose, PaaS has an equal important when compared to SaaS.<br>For Government Incentives purpose, PaaS has a very strong importance when compared to Traditional ERP.<br>For Government Incentives purpose, SaaS has a very strong importance when compared to Traditional ERP.                                                                   |
|                                  | SaaS            | B                               | 2           |                           |                                                                                                                                                                                                                                                                                                                                                                                                                                                                                                                                                                                                                                                                                       |
|                                  | Traditional ERP | A                               | 9           |                           |                                                                                                                                                                                                                                                                                                                                                                                                                                                                                                                                                                                                                                                                                       |
| PaaS                             | SaaS            | A                               | 1           |                           |                                                                                                                                                                                                                                                                                                                                                                                                                                                                                                                                                                                                                                                                                       |
|                                  | Traditional ERP | A                               | 7           |                           |                                                                                                                                                                                                                                                                                                                                                                                                                                                                                                                                                                                                                                                                                       |
| SaaS                             | Traditional ERP | A                               | 7           |                           |                                                                                                                                                                                                                                                                                                                                                                                                                                                                                                                                                                                                                                                                                       |
| Current Law Protection           |                 |                                 |             |                           | Consistency Ratio (CR): <input checked="" type="checkbox"/> 4% The selection is spot on!                                                                                                                                                                                                                                                                                                                                                                                                                                                                                                                                                                                              |
| A                                | B               | Which is more relevant? A or B? | Scale (1-9) | Optimized Change Sequence | Optimized Choice and Scale                                                                                                                                                                                                                                                                                                                                                                                                                                                                                                                                                                                                                                                            |
| IaaS                             | PaaS            | B                               | 2           |                           | Logic check<br>For Current Law Protection purpose, PaaS has a weaker importance when compared to IaaS.<br>For Current Law Protection purpose, SaaS has a weaker importance when compared to IaaS.<br>For Current Law Protection purpose, IaaS has an extreme importance when compared to Traditional ERP.<br>For Current Law Protection purpose, PaaS has an equal important when compared to SaaS.<br>For Current Law Protection purpose, PaaS has a very strong importance when compared to Traditional ERP.<br>For Current Law Protection purpose, SaaS has a very strong importance when compared to Traditional ERP.                                                             |
|                                  | SaaS            | B                               | 2           |                           |                                                                                                                                                                                                                                                                                                                                                                                                                                                                                                                                                                                                                                                                                       |
|                                  | Traditional ERP | A                               | 9           |                           |                                                                                                                                                                                                                                                                                                                                                                                                                                                                                                                                                                                                                                                                                       |
| PaaS                             | SaaS            | A                               | 1           |                           |                                                                                                                                                                                                                                                                                                                                                                                                                                                                                                                                                                                                                                                                                       |
|                                  | Traditional ERP | A                               | 7           |                           |                                                                                                                                                                                                                                                                                                                                                                                                                                                                                                                                                                                                                                                                                       |
| SaaS                             | Traditional ERP | A                               | 7           |                           |                                                                                                                                                                                                                                                                                                                                                                                                                                                                                                                                                                                                                                                                                       |
| Vendor Technical Support         |                 |                                 |             |                           | Consistency Ratio (CR): <input checked="" type="checkbox"/> 4% The selection is spot on!                                                                                                                                                                                                                                                                                                                                                                                                                                                                                                                                                                                              |
| A                                | B               | Which is more relevant? A or B? | Scale (1-9) | Optimized Change Sequence | Optimized Choice and Scale                                                                                                                                                                                                                                                                                                                                                                                                                                                                                                                                                                                                                                                            |
| IaaS                             | PaaS            | B                               | 2           |                           | Logic check<br>For Vendor Technical Support purpose, PaaS has a weaker importance when compared to IaaS.<br>For Vendor Technical Support purpose, SaaS has a weaker importance when compared to IaaS.<br>For Vendor Technical Support purpose, IaaS has an extreme importance when compared to Traditional ERP.<br>For Vendor Technical Support purpose, PaaS has an equal important when compared to SaaS.<br>For Vendor Technical Support purpose, PaaS has a very strong importance when compared to Traditional ERP.<br>For Vendor Technical Support purpose, SaaS has a very strong importance when compared to Traditional ERP.                                                 |
|                                  | SaaS            | B                               | 2           |                           |                                                                                                                                                                                                                                                                                                                                                                                                                                                                                                                                                                                                                                                                                       |
|                                  | Traditional ERP | A                               | 9           |                           |                                                                                                                                                                                                                                                                                                                                                                                                                                                                                                                                                                                                                                                                                       |
| PaaS                             | SaaS            | A                               | 1           |                           |                                                                                                                                                                                                                                                                                                                                                                                                                                                                                                                                                                                                                                                                                       |
|                                  | Traditional ERP | A                               | 7           |                           |                                                                                                                                                                                                                                                                                                                                                                                                                                                                                                                                                                                                                                                                                       |
| SaaS                             | Traditional ERP | A                               | 7           |                           |                                                                                                                                                                                                                                                                                                                                                                                                                                                                                                                                                                                                                                                                                       |
| Vendor Skilled Resources         |                 |                                 |             |                           | Consistency Ratio (CR): <input checked="" type="checkbox"/> 4% The selection is spot on!                                                                                                                                                                                                                                                                                                                                                                                                                                                                                                                                                                                              |
| A                                | B               | Which is more relevant? A or B? | Scale (1-9) | Optimized Change Sequence | Optimized Choice and Scale                                                                                                                                                                                                                                                                                                                                                                                                                                                                                                                                                                                                                                                            |
| IaaS                             | PaaS            | B                               | 2           |                           | Logic check<br>For Vendor Skilled Resources purpose, PaaS has a weaker importance when compared to IaaS.<br>For Vendor Skilled Resources purpose, SaaS has a weaker importance when compared to IaaS.<br>For Vendor Skilled Resources purpose, IaaS has an extreme importance when compared to Traditional ERP.<br>For Vendor Skilled Resources purpose, PaaS has an equal important when compared to SaaS.<br>For Vendor Skilled Resources purpose, PaaS has a very strong importance when compared to Traditional ERP.<br>For Vendor Skilled Resources purpose, SaaS has a very strong importance when compared to Traditional ERP.                                                 |
|                                  | SaaS            | B                               | 2           |                           |                                                                                                                                                                                                                                                                                                                                                                                                                                                                                                                                                                                                                                                                                       |
|                                  | Traditional ERP | A                               | 9           |                           |                                                                                                                                                                                                                                                                                                                                                                                                                                                                                                                                                                                                                                                                                       |
| PaaS                             | SaaS            | A                               | 1           |                           |                                                                                                                                                                                                                                                                                                                                                                                                                                                                                                                                                                                                                                                                                       |
|                                  | Traditional ERP | A                               | 7           |                           |                                                                                                                                                                                                                                                                                                                                                                                                                                                                                                                                                                                                                                                                                       |
| SaaS                             | Traditional ERP | A                               | 7           |                           |                                                                                                                                                                                                                                                                                                                                                                                                                                                                                                                                                                                                                                                                                       |
| Vendor Cloud ERP Training Skills |                 |                                 |             |                           | Consistency Ratio (CR): <input checked="" type="checkbox"/> 4% The selection is spot on!                                                                                                                                                                                                                                                                                                                                                                                                                                                                                                                                                                                              |
| A                                | B               | Which is more relevant? A or B? | Scale (1-9) | Optimized Change Sequence | Optimized Choice and Scale                                                                                                                                                                                                                                                                                                                                                                                                                                                                                                                                                                                                                                                            |
| IaaS                             | PaaS            | B                               | 2           |                           | Logic check<br>For Vendor Cloud ERP Training Skills purpose, PaaS has a weaker importance when compared to IaaS.<br>For Vendor Cloud ERP Training Skills purpose, SaaS has a weaker importance when compared to IaaS.<br>For Vendor Cloud ERP Training Skills purpose, IaaS has an extreme importance when compared to Traditional ERP.<br>For Vendor Cloud ERP Training Skills purpose, PaaS has an equal important when compared to SaaS.<br>For Vendor Cloud ERP Training Skills purpose, PaaS has a very strong importance when compared to Traditional ERP.<br>For Vendor Cloud ERP Training Skills purpose, SaaS has a very strong importance when compared to Traditional ERP. |
|                                  | SaaS            | B                               | 2           |                           |                                                                                                                                                                                                                                                                                                                                                                                                                                                                                                                                                                                                                                                                                       |
|                                  | Traditional ERP | A                               | 9           |                           |                                                                                                                                                                                                                                                                                                                                                                                                                                                                                                                                                                                                                                                                                       |
| PaaS                             | SaaS            | A                               | 1           |                           |                                                                                                                                                                                                                                                                                                                                                                                                                                                                                                                                                                                                                                                                                       |
|                                  | Traditional ERP | A                               | 7           |                           |                                                                                                                                                                                                                                                                                                                                                                                                                                                                                                                                                                                                                                                                                       |
| SaaS                             | Traditional ERP | A                               | 7           |                           |                                                                                                                                                                                                                                                                                                                                                                                                                                                                                                                                                                                                                                                                                       |

Reports page with details on the weight and priority of the factors selected by the user and the results for both Cloud Model and Cloud Service through multiple graphics based on the used model: Technology, Organisation and Environment.

## Decision Model based on Factors Selection

[Return to Factors Priorities](#)

| Relative Advantage (RA)             | Weights | Ranking |
|-------------------------------------|---------|---------|
| Cost Savings                        | 25.00%  | 1       |
| Quality of Operations               | 25.00%  | 1       |
| Time to Market                      | 25.00%  | 1       |
| Efficiency on Resources Utilization | 25.00%  | 1       |

| Competitive Pressure (CP) | Weights | Ranking |
|---------------------------|---------|---------|
| Price Competition         | 33.33%  | 1       |
| Quality Competition       | 33.33%  | 1       |
| Competitors Status        | 33.33%  | 1       |

| Compatibility (C)               | Weights | Ranking |
|---------------------------------|---------|---------|
| IT Infrastructure Compatibility | 33.33%  | 1       |
| Company Mission                 | 33.33%  | 1       |
| Operations compatibility        | 33.33%  | 1       |

| Regulatory Compliance (RC) | Weights | Ranking |
|----------------------------|---------|---------|
| Government Incentives      | 50.00%  | 1       |
| Current Law Protection     | 50.00%  | 1       |

| Complexity (CX)         | Weights | Ranking |
|-------------------------|---------|---------|
| Migration Complexity    | 25.00%  | 1       |
| Skills Complexity       | 25.00%  | 1       |
| User Satisfaction Level | 25.00%  | 1       |
| Data Security           | 25.00%  | 1       |

| Vendor Support (VS)              | Weights | Ranking |
|----------------------------------|---------|---------|
| Vendor Technical Support         | 33.33%  | 1       |
| Vendor Skilled Resources         | 33.33%  | 1       |
| Vendor Cloud ERP Training Skills | 33.33%  | 1       |

| Technology Readiness (TR)     | Weights | Ranking |
|-------------------------------|---------|---------|
| IT Infrastructure Maturity    | 50.00%  | 1       |
| Managerial & Technical Skills | 50.00%  | 1       |

| Organisation Size (OS) | Weights | Ranking |
|------------------------|---------|---------|
| Number of Employees    | 50.00%  | 1       |
| Financial Investments  | 50.00%  | 1       |

| Organisation Competency (OC)  | Weights | Ranking |
|-------------------------------|---------|---------|
| Available Cloud ERP Knowledge | 50.00%  | 1       |
| Company Culture               | 50.00%  | 1       |

## Results based on Decision Model for which Cloud Model to Select

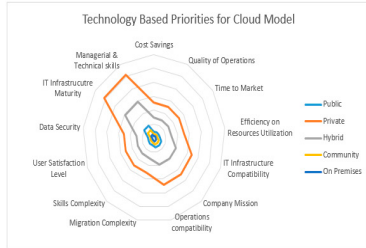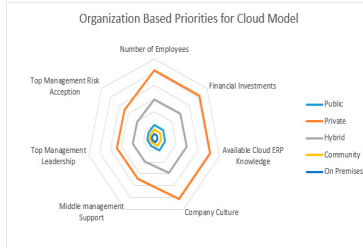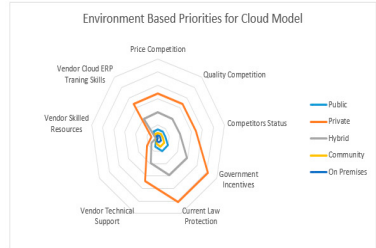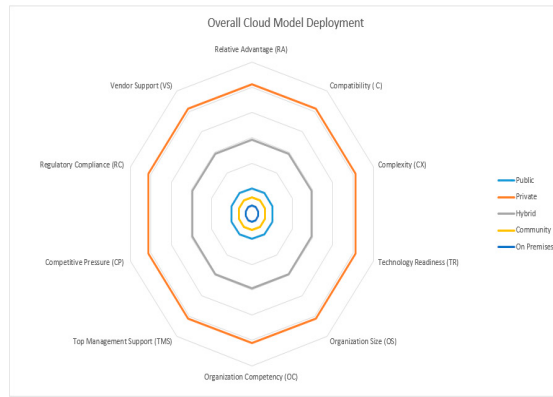

## Results based on Decision Model for which Cloud Service to Select

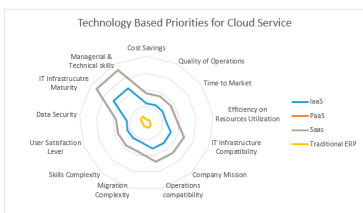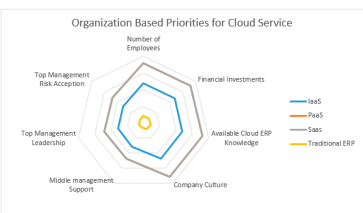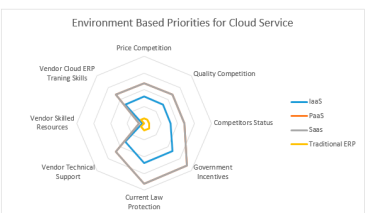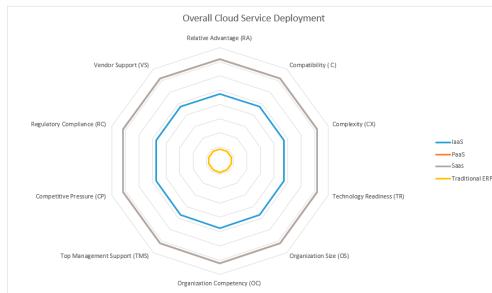

Read Me page with Instructions on how to use the DSS and the used Model to build it:

## APPENDIX C. EVALUATION

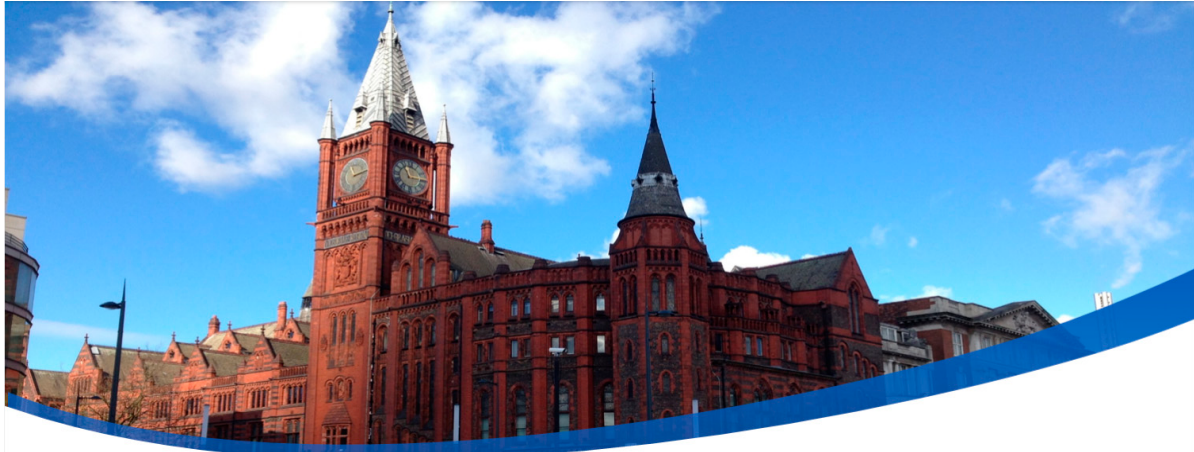

# Evaluation Cloud ERP Decision Support Tool

Dear participant:

My name is Marlene Marinho and I am a graduate student at the **University of Liverpool** where I am studying for a Master of Science in Information Systems Management. For the final project, I am researching the Cloud ERP decision making process. You were selected to test and evaluate a Decision Support System which will help you decide to adopt Cloud ERP in your organization.

The evaluation results will be implemented in the final Decision Support System which will be of benefit to all companies that wish to implement Cloud ERP applications. Your evaluation responses will remain completely anonymous and will only be used collectively. There is also no compensation for responding to this test and evaluation.

Your evaluation of the Decision Support System will be provided through a short questionnaire which will take approximately **10** minutes to complete the 10 questions after you have used and tested the Decision Support System.

Participation in this project is entirely voluntary and if you do not wish to take part then please just let me know. If at any point you do not want to continue, you can close the window(s). If you are completing the evaluation, please ensure that you click on the Submit button at the very end of it.

Any concerns about the ethical aspects of this research can be addressed to the University's Research Participant Advocate at [liverpoolethics@ohcampus.com](mailto:liverpoolethics@ohcampus.com). Any other questions or comments regarding the evaluation or the tool, please contact me at [marlene.marinho@online.liverpool.ac.uk](mailto:marlene.marinho@online.liverpool.ac.uk). You may want to keep a copy of this Participant Information Sheet for your records.

1. By clicking on the Yes option, you will accept to participate on this evaluation.

- ☐ Yes
- ☐ No

---

Next

0%

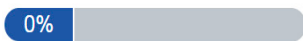

Cloud ERP adoption is part of an IT strategy to reduce operational costs as it allows organizations to focus on core competencies.

In the research taken, Cloud ERP can take the Service Model of IaaS, PaaS or SaaS as anything deployed into the Cloud becomes Cloud.

To support organizations in the decision-making process to adopt Cloud ERP, an analysis of the factors that influence Cloud ERP has been conducted with a comprehensive literature review on Technology, Organization, Environment (TOE) and Diffusion of Innovation (DOI) frameworks.

Next, to that, a survey questionnaire was sent to decision-makers to understand the predictors of the decision regarding Service and deployment.

With this input, the decision support tool was built and sent for your review.



7. The output reports based on the input inserted provide accurate results. \*

|                   | 1                     | 2                     | 3                     | 4                     | 5                     |                |
|-------------------|-----------------------|-----------------------|-----------------------|-----------------------|-----------------------|----------------|
| Strongly disagree | <input type="radio"/> | Strongly agree |

8. The performance of the reports displayed in the decision support tool is acceptable from user point of view ( less than 8 seconds). \*

|                   | 1                     | 2                     | 3                     | 4                     | 5                     |                |
|-------------------|-----------------------|-----------------------|-----------------------|-----------------------|-----------------------|----------------|
| Strongly disagree | <input type="radio"/> | Strongly agree |

9. Are there any factors that you would like to see added to the decision Tool? The factors are cost savings, time to market, data security, etc. \*

10. Do you have any suggestions on how to improve the Decision Support Tool? \*

Back

Submit

50% 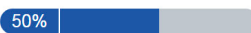

Supplement: s1 [file s1 › electronics-1174181 supplementary.pdf]
